# Supplementary material
Source: publisher figshare collection journal article supplement (https://acs.figshare.com/ndownloader/files/9420166)
Supplement: Supplementary file 1 [file 9420166]

# Regulated catalytic activity of peptide-nanoparticle conjugates

*Dorian J. Mikolajczak<sup>1</sup>, Jason L. Heier<sup>1</sup>, Boris Schade<sup>2</sup>, Beate Kokschi<sup>1</sup>*

<sup>1</sup>Freie Universität Berlin Department of Biology, Chemistry and Pharmacy, Institute of Chemistry and Biochemistry Berlin, Germany

<sup>2</sup>Freie Universität Berlin Department of Biology, Chemistry and Pharmacy, Institute of Chemistry and Biochemistry Research Center for Electron Microscopy Berlin, Germany

## Supporting Information

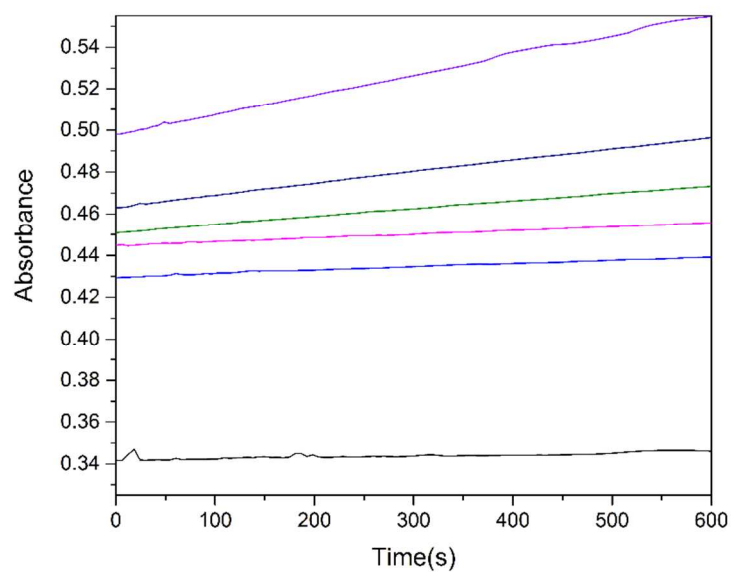

**Figure S1.** Time dependence of the absorption of formed *p*-nitrophenol at a wavelength of 405 nm. Reactions were catalyzed by Au@E3H15 at 25 °C in Tris/HCl buffer pH 7.3 with 2 % acetonitrile and show the absorption at the used concentrations of 0.025, 0.075, 0.1, 0.2, 0.3 and 0.5 mM (from bottom to top).

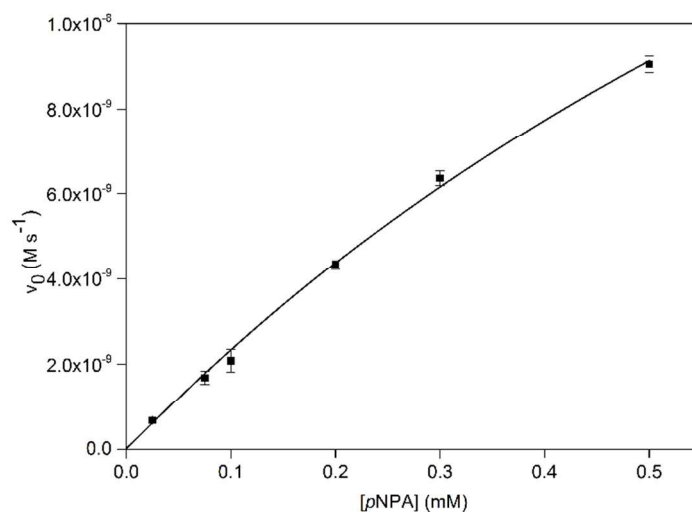

**Figure S2.** Uncorrected initial velocity against *p*NPA concentration of measured *p*NPA hydrolysis catalyzed by Au@E3H15.

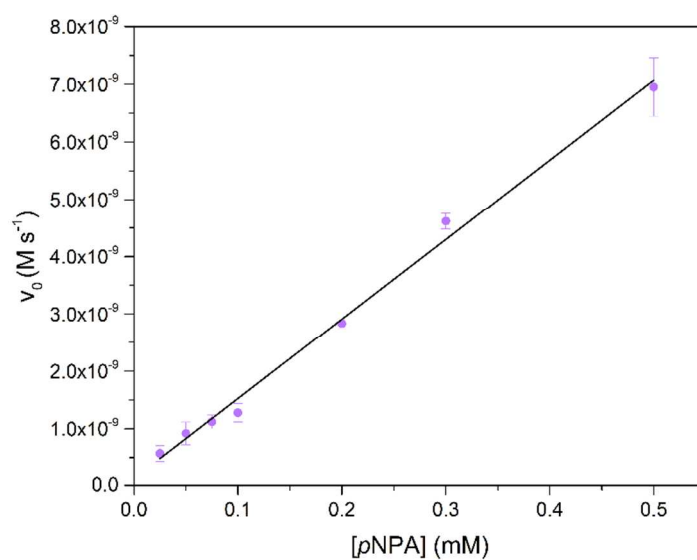

**Figure S3.** Initial velocity against *p*NPA concentration of measured *p*NPA hydrolysis blank reactions and corresponding linear fit.

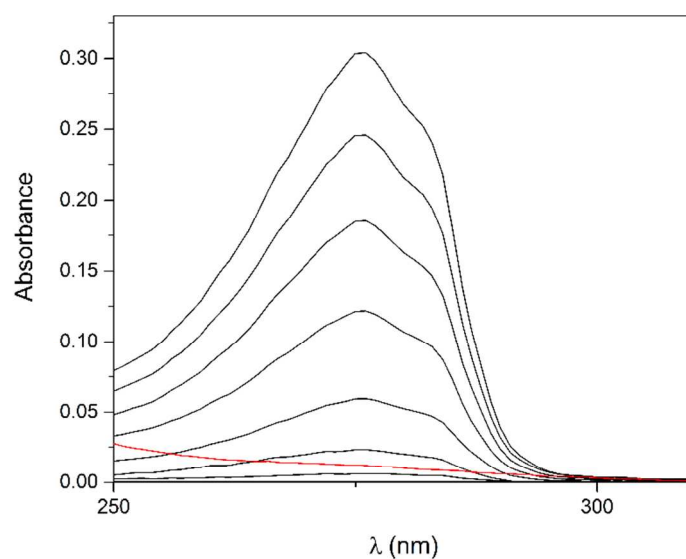

**Figure S4.** UV/vis-spectra of  $\text{NH}_2\text{-CGGYE-OH}$  (black) showing the absorption band of tyrosine (274 nm) at different concentrations of 0.35, 0.27, 0.21, 0.14, 0.07, 0.03 and 0.005 mM at pH 7.3 and supernatant of  $\text{Au@E3H15}$  (red) after synthesis, showing the absence of tyrosine absorption.

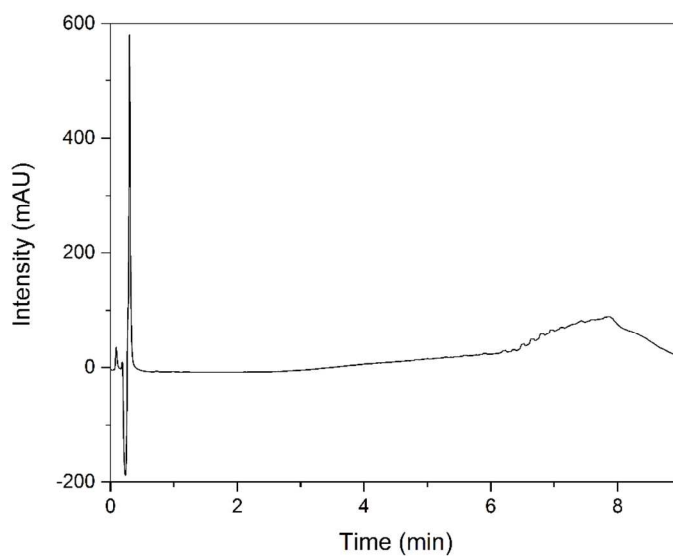

**Figure S5.** RP-HPLC chromatogram showing the absence of  $\text{E3H15}$  in the supernatant of  $\text{Au@E3H15}$  after synthesis.  $t_{\text{R(E3H15)}} = 2.81$  min.

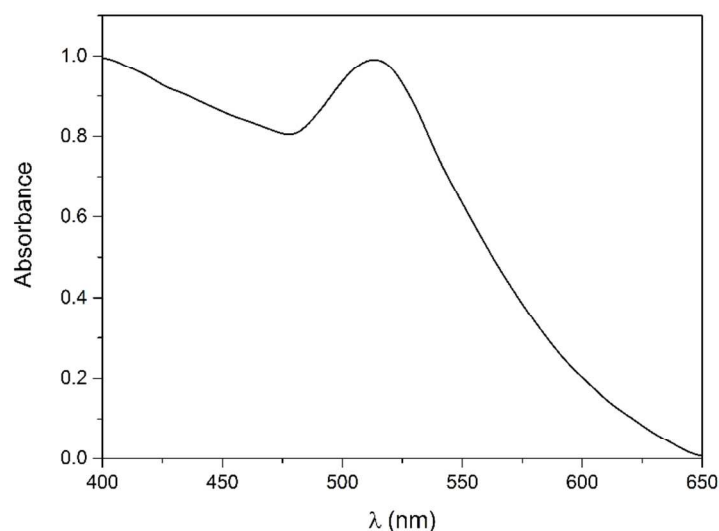

**Figure S6.** Normalized UV/Vis-Spectra of Au@E3H15 showing the surface plasmon resonance absorption maximum at 514 nm.

### Calculation of gold nanoparticle concentration

Concentration of gold nanoparticle dispersion was calculated according to equations reported by Liu *et al.*<sup>1</sup> Short, the average size of gold nanoparticles ( $D$ ) was determined by transmission electron microscopy (TEM). The average number of gold atoms per nanoparticle ( $N$ ) was calculated using Eq. (1), which assumes spherical shaped particles and a uniform fcc structure by taking into account the density of fcc gold ( $\rho = 19.3 \text{ g/cm}^3$ ) and the atomic weight of gold ( $M_{\text{Au}} = 197 \text{ g/mol}$ ).

$$N = \frac{\pi \rho D^3}{6M} = 30.89602D^3 \quad (1)$$

Then, the molar concentration of the gold nanoparticle dispersion was calculated by dividing the initial amount of gold salt added to the reaction solution (which corresponds to the total number of gold atoms  $N_{\text{total}}$ ) by the average number of gold atoms per gold nanoparticle ( $N$ ) according to Eq. (2), where  $V$  is the total reaction volume and  $N_A$  is the Avogadro constant.

$$C = \frac{N_{\text{total}}}{NVN_A} \quad (2)$$

The obtained molar concentrations were also in good agreement with reported methods to determine gold nanoparticle concentration by UV/vis-spectroscopy.<sup>1,2</sup>

## References

- (1) Liu, X.; Atwater, M.; Wang, J.; Huo, Q. *Colloids Surfaces B Biointerfaces* **2007**, 58 (1), 3–7.
- (2) Haiss, W.; Thanh, N. T. K.; Aveyard, J.; Fernig, D. G. *Anal. Chem.* **2007**, 79 (11), 4215–4221.
